# Supplementary material for: Investigation of electrocatalysis for tiered-tower micro-electro-mechanical-system-based biosensors: application in the early detection of the thrombosis factor trimethylamine N-oxide
Source: Royal Society of Chemistry journal article supplement (doi:10.1039/d4nr02693d), 2024-01-01
Supplement: d4nr02693d1.pdf [file d4nr02693d1.pdf]

## Supporting Materials

**Paper Title:** Investigation of Electrocatalysis for Tiered-Tower Micro-Electro-Mechanical-Systems  
Biosensors: Applied to Early Prevention of Thrombosis Factor Trimethylamine N-Oxide

Wei-Cheng Lin<sup>1,2,\*</sup>, Shang-Chun Chou<sup>1</sup>, Wei-Lun Yen<sup>1</sup>, Yun-Yu Hsieh<sup>1</sup>, Chun-Ting Hsieh<sup>1</sup>

<sup>1</sup> Department of Electrical Engineering, Chang Gung University, Taoyuan, 33302, Taiwan

<sup>2</sup> Department of Trauma and Emergency, Chang Gung Memorial Hospital, Linko, 33302, Taiwan

\* Corresponding authors

|                    |        |
|--------------------|--------|
| Table S1 . . . . . | Page 2 |
| Figure S1. . . . . | Page 3 |
| Figure S2. . . . . | Page 4 |
| Figure S3. . . . . | Page 5 |
| Figure S4. . . . . | Page 6 |

**Table S1.** The parameter lists of improved Cole-Cole model and extraction results in solution of pH 7.0 and pH 4.0.  $\alpha$  is a dispersion coefficient evaluating the relaxation time constants in an analyte.

| Parameters in Figure 1D | pH 7.2         | pH 4.0         | Erythrocytes                                       | Leukocytes                                         | Plasma                                             |
|-------------------------|----------------|----------------|----------------------------------------------------|----------------------------------------------------|----------------------------------------------------|
| <i>R_catalyzed</i>      | 350 $\Omega$   | 182 $\Omega$   | 627 $\Omega$<br>675 $\Omega$<br>715 $\Omega$       | 450 $\Omega$<br>475 $\Omega$<br>460 $\Omega$       | 431 $\Omega$<br>496 $\Omega$<br>460 $\Omega$       |
| <i>C_catalyzed</i>      | 30 nF          | 35 nF          | 22 nF<br>25 nF<br>24 nF                            | 24 nF<br>21 nF<br>22 nF                            | 24 nF<br>22 nF<br>25 nF                            |
| <i>Rp_catalyzed</i>     | 550 K $\Omega$ | 880 K $\Omega$ | 140 K $\Omega$<br>120 K $\Omega$<br>130 K $\Omega$ | 358 K $\Omega$<br>341 K $\Omega$<br>332 K $\Omega$ | 261 K $\Omega$<br>275 K $\Omega$<br>256 K $\Omega$ |
| <i>C_solution</i>       | 3 nF           | 3 nF           | 3 nF                                               | 3 nF                                               | 3 nF                                               |
| <i>C_enzyme</i>         | 25 nF          | 25 nF          | 25 nF                                              | 25 nF                                              | 25 nF                                              |

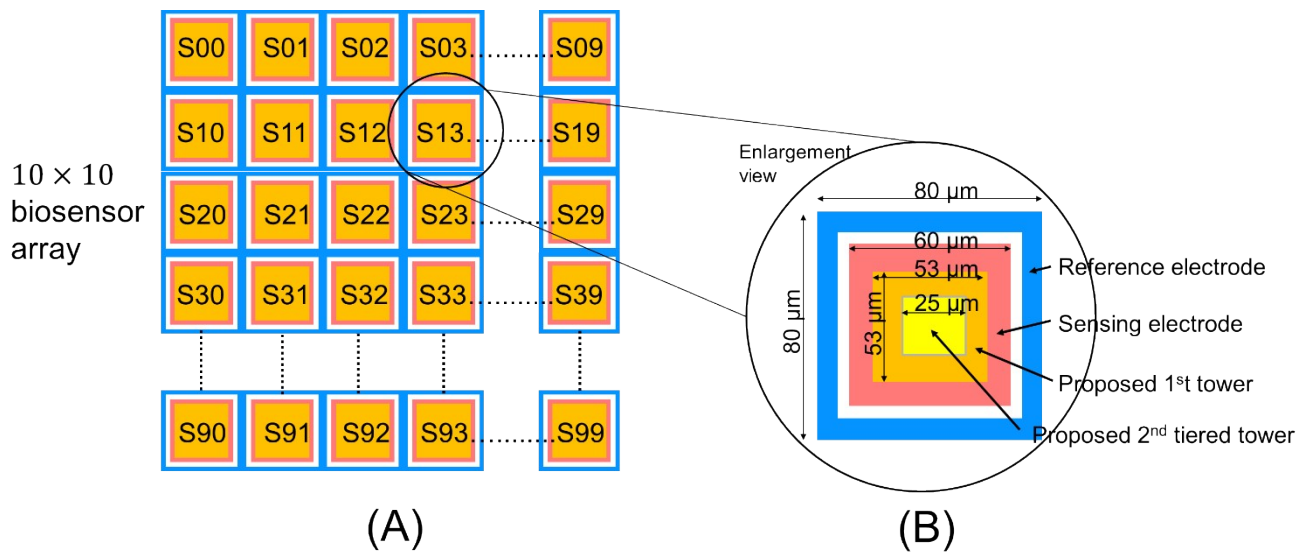

**Figure S1.** (A) The arrangement of the proposed biosensor pixels, and (B) the critical dimensions for each tiered layer in a pixel.

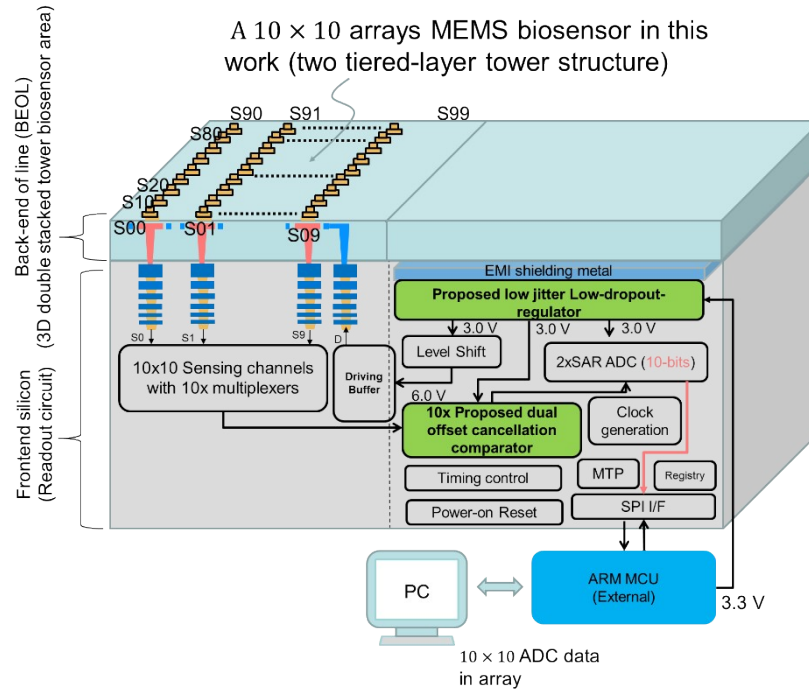

(A)

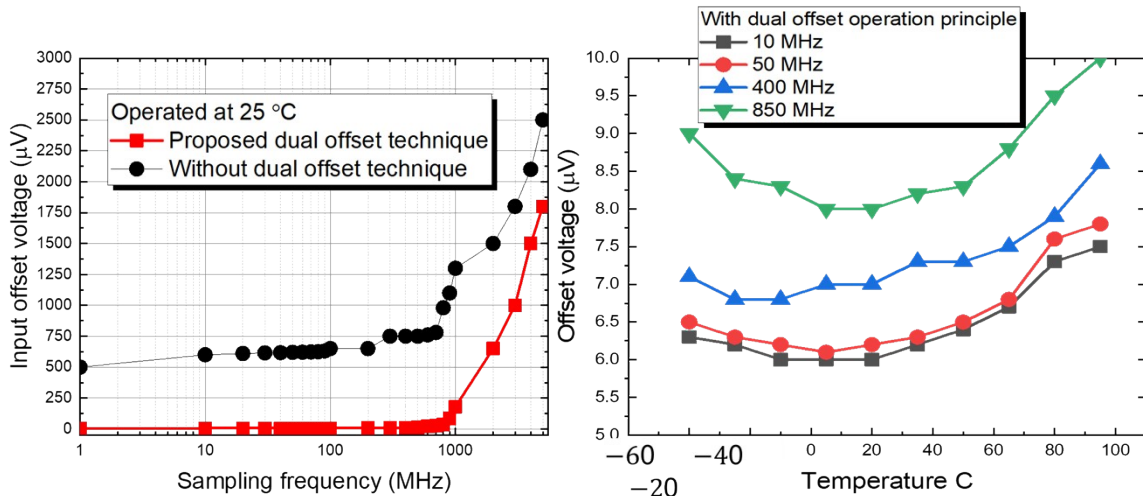

(B)

(C)

**Figure S2.** (A) The system architecture of the proposed MEMS biosensor array and readout circuit. The readout circuit includes a low-dropout (LDO) regulator, a dual offset cancellation comparator, and a 10-bit ADC. (B) The measured result of input offset voltage for the dual offset cancellation comparator in the readout circuit. (C) The low offset voltage against temperature in the readout circuit.

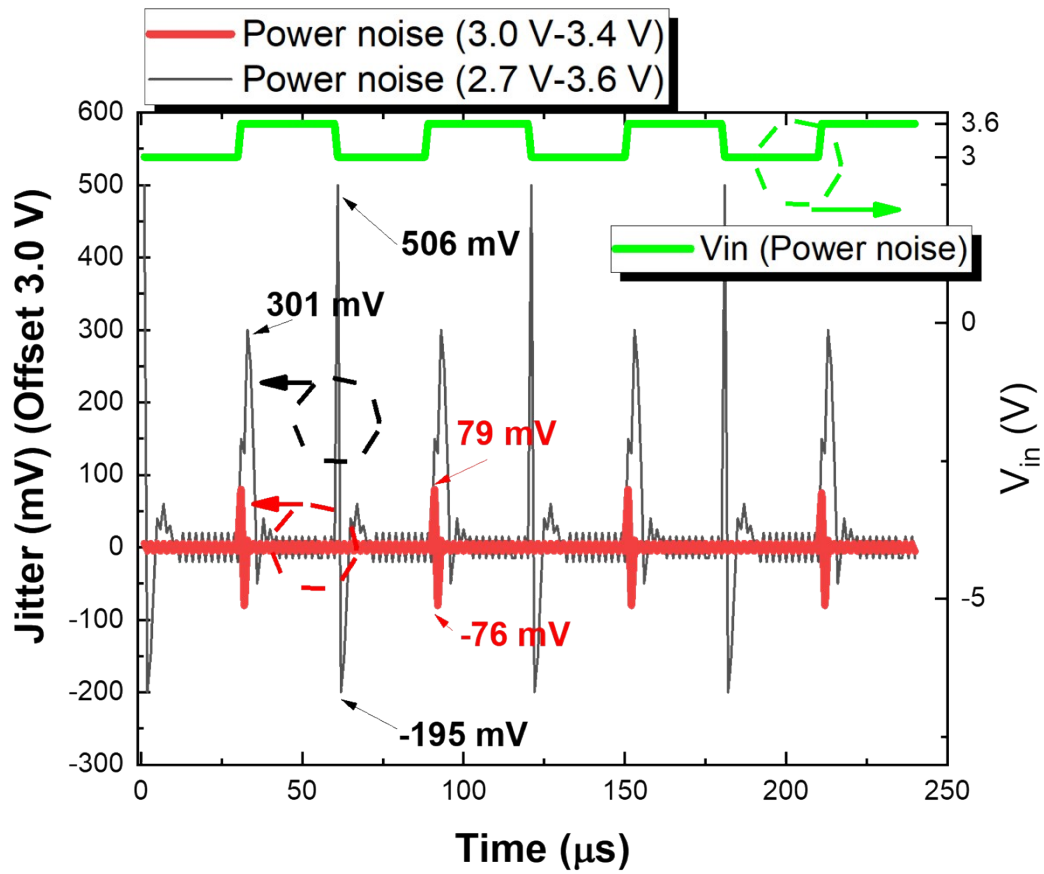

**Figure S3.** The measurement of output jitter from node  $V_{MB}$  of the proposed low-jitter low-dropout regulator shows the jitter offset by 3.0V. The jitters are investigated under power noise variations from 3.0V to 3.4V and from 2.7V to 3.6V.

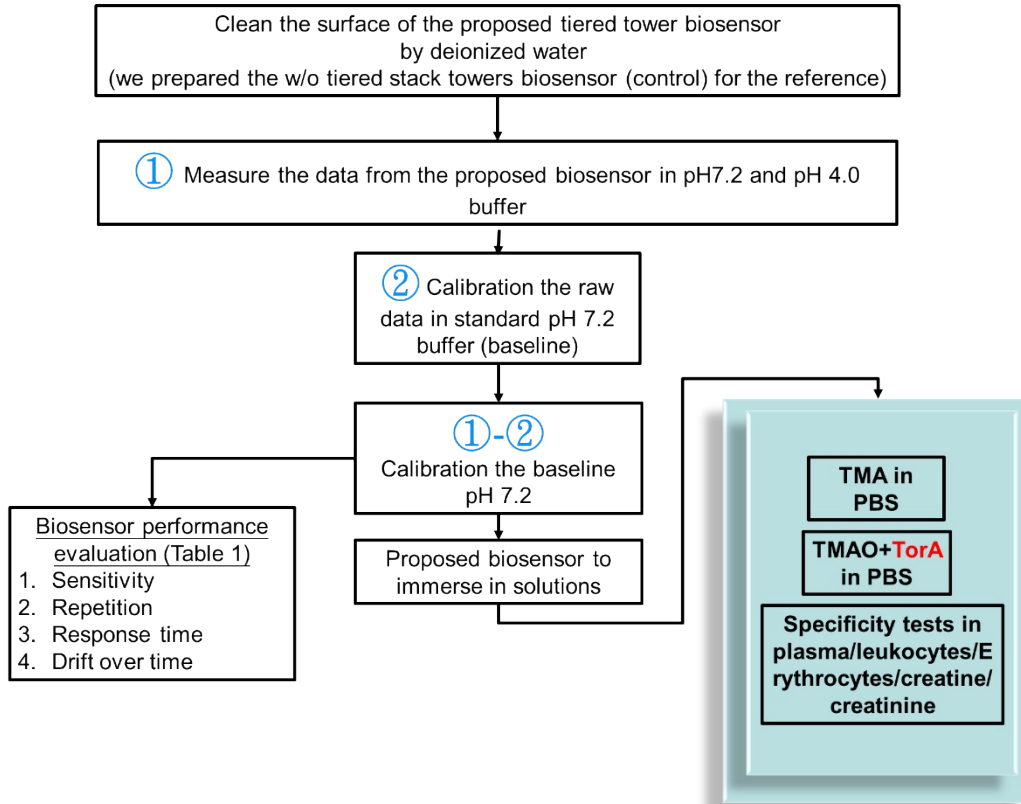

**Figure S4.** Measurement and calibration setup for TMAO with enzyme TorA begins with baseline calibration using pH 7.2 buffer. Subsequently, the proposed biosensor's performance is evaluated for sensitivity, repeatability, response time, and drift. Finally, specificity tests are conducted on plasma, erythrocytes, leukocytes, as well as creatine and creatinine.
